# Supplementary material for: Acid extraction to a hydrophobic ionic liquid: the role of added tributylphosphate investigated by experiments and simulations
Source: Royal Society of Chemistry journal article supplement (doi:10.1039/c2cp40129k), 2012-01-01
Supplement: c2cp40129k.pdf [file c2cp40129k.pdf]

## Supplementary Materials.

Table S1: Average numbers of “extracted” species in the MD simulations "at 400 K" (30 ns at 400 K, followed by 3 ns at 300 K). Species beyond 8 Å from the interface; averages calculated during the last 2 ns of dynamics.

Figure S1: [BMI][Tf<sub>2</sub>N] / "pH neutral" water systems without TBP (left) and with TBP (right). Lines 1 to 4: snapshots highlighting specific solutes. Bottom: density curves of BMI<sup>+</sup> in red, Tf<sub>2</sub>N<sup>-</sup> in green, water in blue, TBP in orange.

Figure S2: [BMI][Tf<sub>2</sub>N] / PTA<sup>mix</sup> systems without TBP (left) and with TBP (right). Lines 1 to 5: snapshots highlighting specific solutes. Bottom: density curves of BMI<sup>+</sup> in red, Tf<sub>2</sub>N<sup>-</sup> in green, water in blue, TBP in orange, HTcO<sub>4</sub> in red, H<sub>3</sub>O<sup>+</sup> in blue and TcO<sub>4</sub><sup>-</sup> in green.

Figure S3: [BMI][Tf<sub>2</sub>N] / PTA<sup>ionic</sup> systems without TBP (left) and with TBP (right). Lines 1 to 5: snapshots highlighting specific solutes. Bottom: density curves of BMI<sup>+</sup> in red, Tf<sub>2</sub>N<sup>-</sup> in green, water in blue, TBP in orange, H<sub>3</sub>O<sup>+</sup> in blue and TcO<sub>4</sub><sup>-</sup> in green.

Figure S4: Number of extracted H<sub>2</sub>O (*in blue*), HA acid (*in red*) and H<sub>3</sub>O<sup>+</sup> (*in black*) molecules during the dynamics (time in ns).

Figure S5: [BMI][Tf<sub>2</sub>N] / H<sub>3</sub>O<sup>+</sup> Tf<sub>2</sub>N<sup>-</sup> system after 100 ns. Snapshots highlighting specific solvents and solutes. Bottom: density curves (BMI<sup>+</sup> in red, Tf<sub>2</sub>N<sup>-</sup> in green, water in blue, H<sub>3</sub>O<sup>+</sup> in black) calculated during the last 1 ns of the dynamics.

| "400 K" System |                    |     | In "bulk" IL     |                              |                                             |                                | In "bulk" water                |                                              |
|----------------|--------------------|-----|------------------|------------------------------|---------------------------------------------|--------------------------------|--------------------------------|----------------------------------------------|
|                |                    |     | HA <sub>IL</sub> | A <sup>-</sup> <sub>IL</sub> | H <sub>3</sub> O <sup>+</sup> <sub>IL</sub> | H <sub>2</sub> O <sub>IL</sub> | BMI <sup>+</sup> <sub>aq</sub> | Tf <sub>2</sub> N <sup>-</sup> <sub>aq</sub> |
| NA             | B                  |     | -                | -                            | -                                           | 206                            | 4                              | 2                                            |
|                | C                  | TBP | -                | -                            | -                                           | 242                            | 4                              | 2                                            |
|                | D <sup>mix</sup>   |     | 78               | 0                            | 0                                           | 150                            | 3                              | 3                                            |
|                | D <sup>ionic</sup> |     | -                | 0                            | 0                                           | 89                             | 1                              | 1                                            |
|                | E <sup>mix</sup>   | TBP | 50               | 1                            | 24                                          | 90                             | 9                              | 0                                            |
|                | E <sup>ionic</sup> | TBP | -                | 0                            | 24                                          | 50                             | 12                             | 0                                            |
| PTA            | F <sup>mix</sup>   |     | 54               | 1                            | 3                                           | 250                            | 9                              | 8                                            |
|                | F <sup>ionic</sup> |     | -                | 1                            | 1                                           | 114                            | 3                              | 1                                            |
|                | G <sup>mix</sup>   | TBP | 90               | 0                            | 6                                           | 124                            | 5                              | 2                                            |
|                | G <sup>ionic</sup> | TBP | -                | 1                            | 19                                          | 57                             | 9                              | 0                                            |

**Table S1:** Average numbers of "extracted" species in the MD simulations "at 400 K" (30 ns at 400 K, followed by 3 ns at 300 K). Species beyond 8 Å from the interface; averages calculated during the last 2 ns of dynamics.

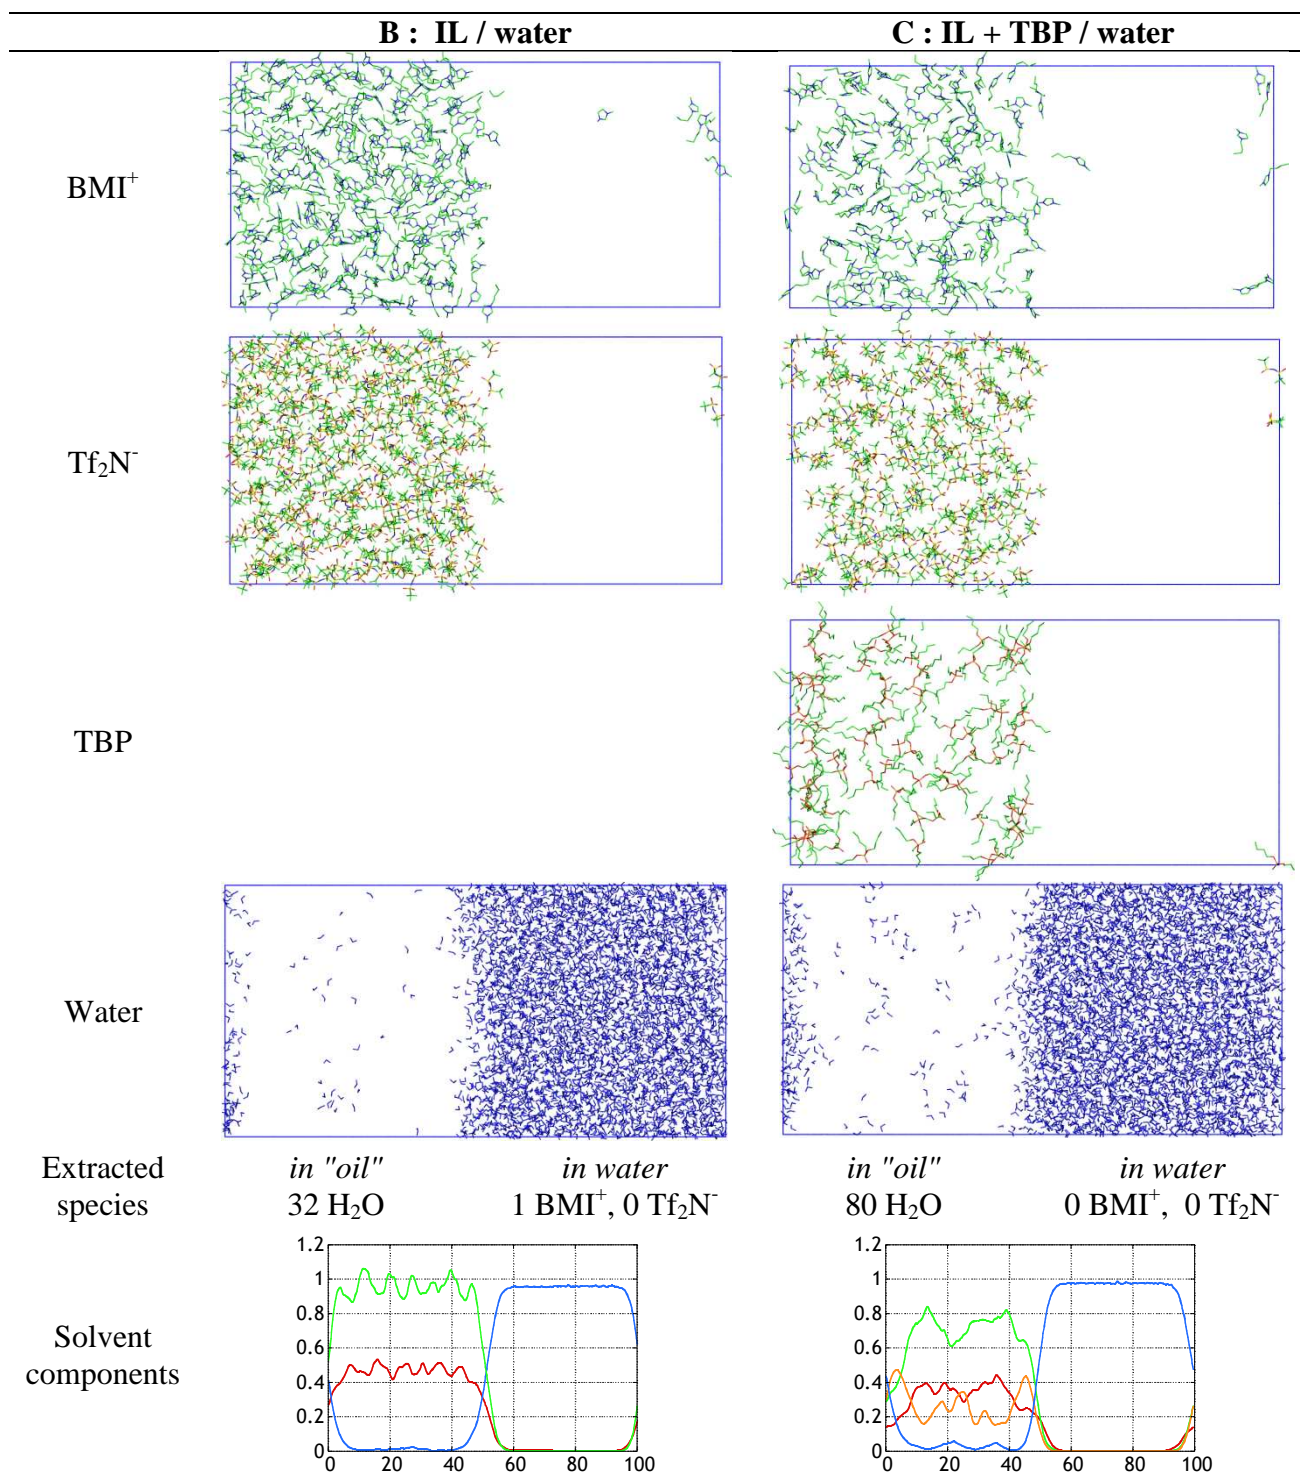

Figure S1: [BMI][Tf<sub>2</sub>N] / "pH neutral" water systems without TBP (left) and with TBP (right). Lines 1 to 4: snapshots highlighting specific solutes. Bottom: density curves of BMI<sup>+</sup> in red, Tf<sub>2</sub>N<sup>-</sup> in green, water in blue, TBP in orange.

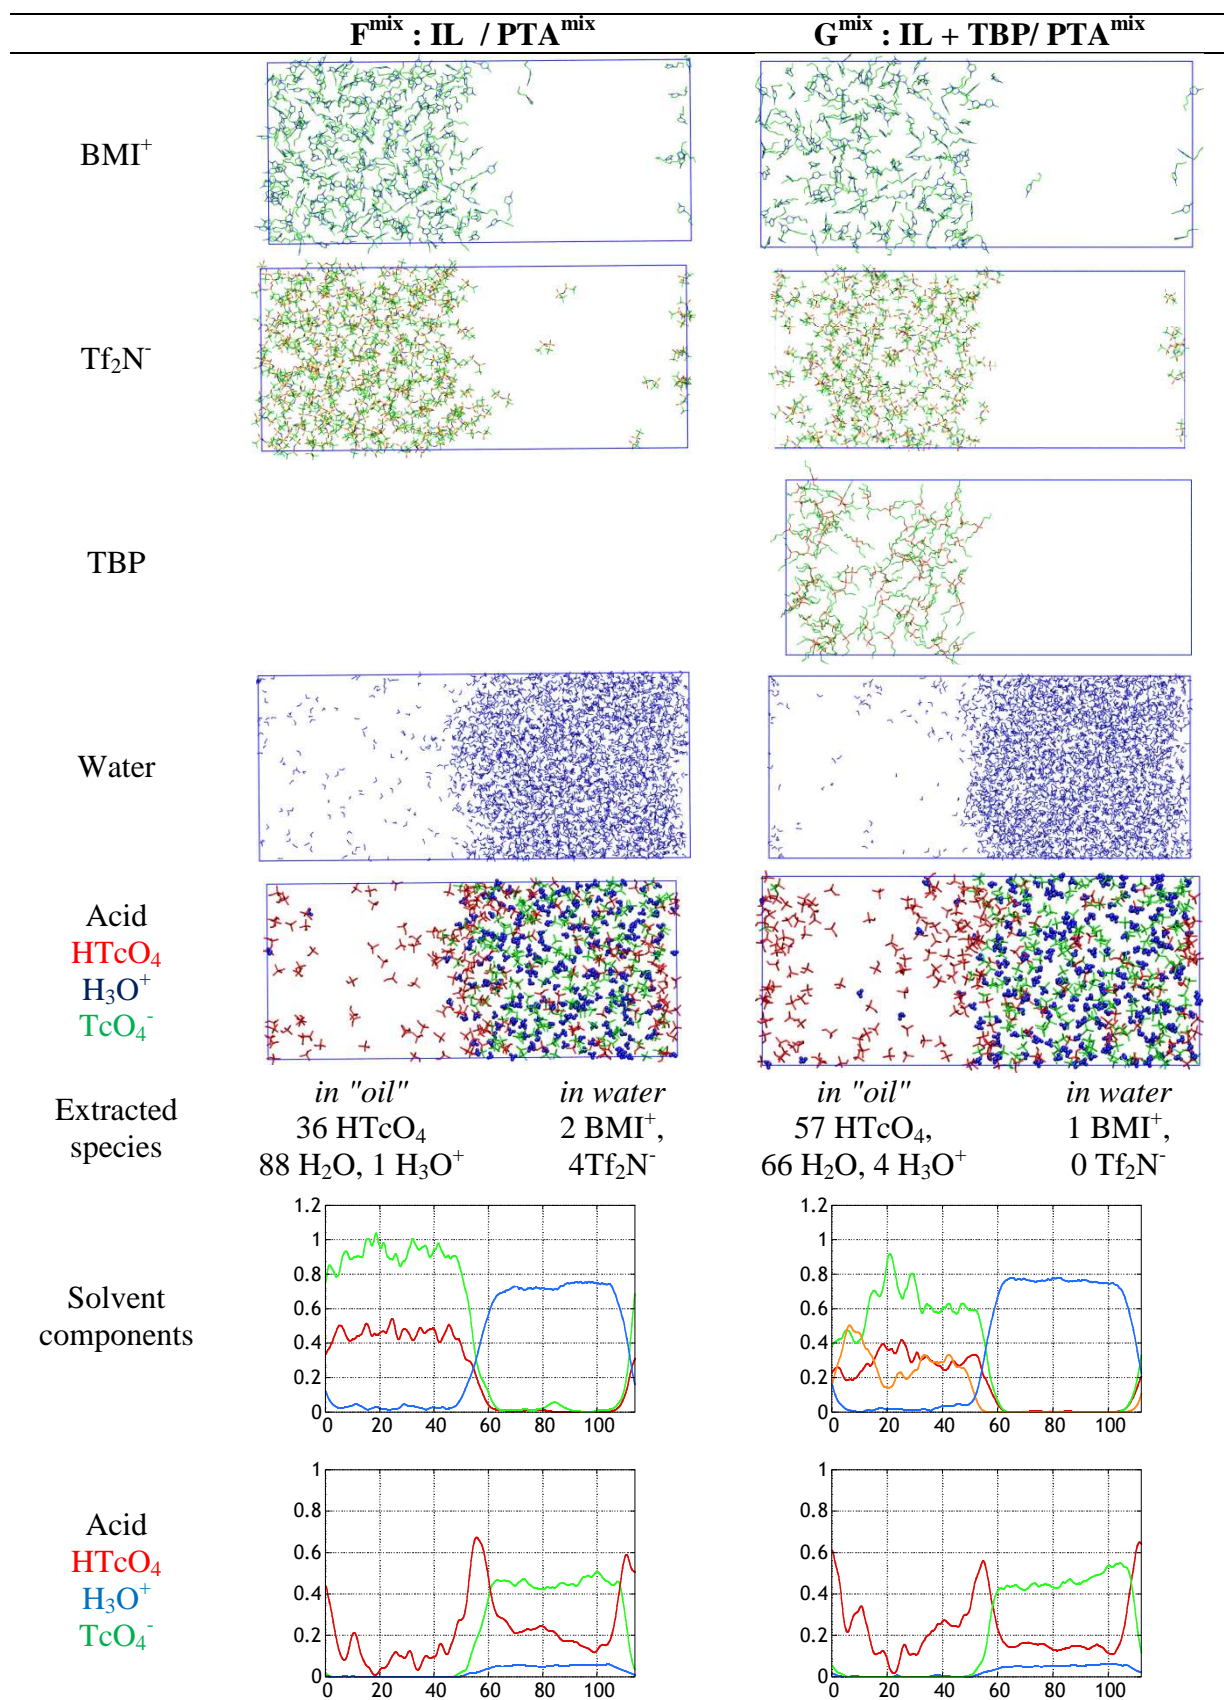

Figure S2: [BMI][Tf<sub>2</sub>N] / PTA<sup>mix</sup> systems without TBP (left) and with TBP (right). Lines 1 to 5: snapshots highlighting specific solutes. Bottom: density curves of BMI<sup>+</sup> in red, Tf<sub>2</sub>N<sup>-</sup> in green, water in blue, TBP in orange, HTcO<sub>4</sub> in red, H<sub>3</sub>O<sup>+</sup> in blue and TcO<sub>4</sub><sup>-</sup> in green.

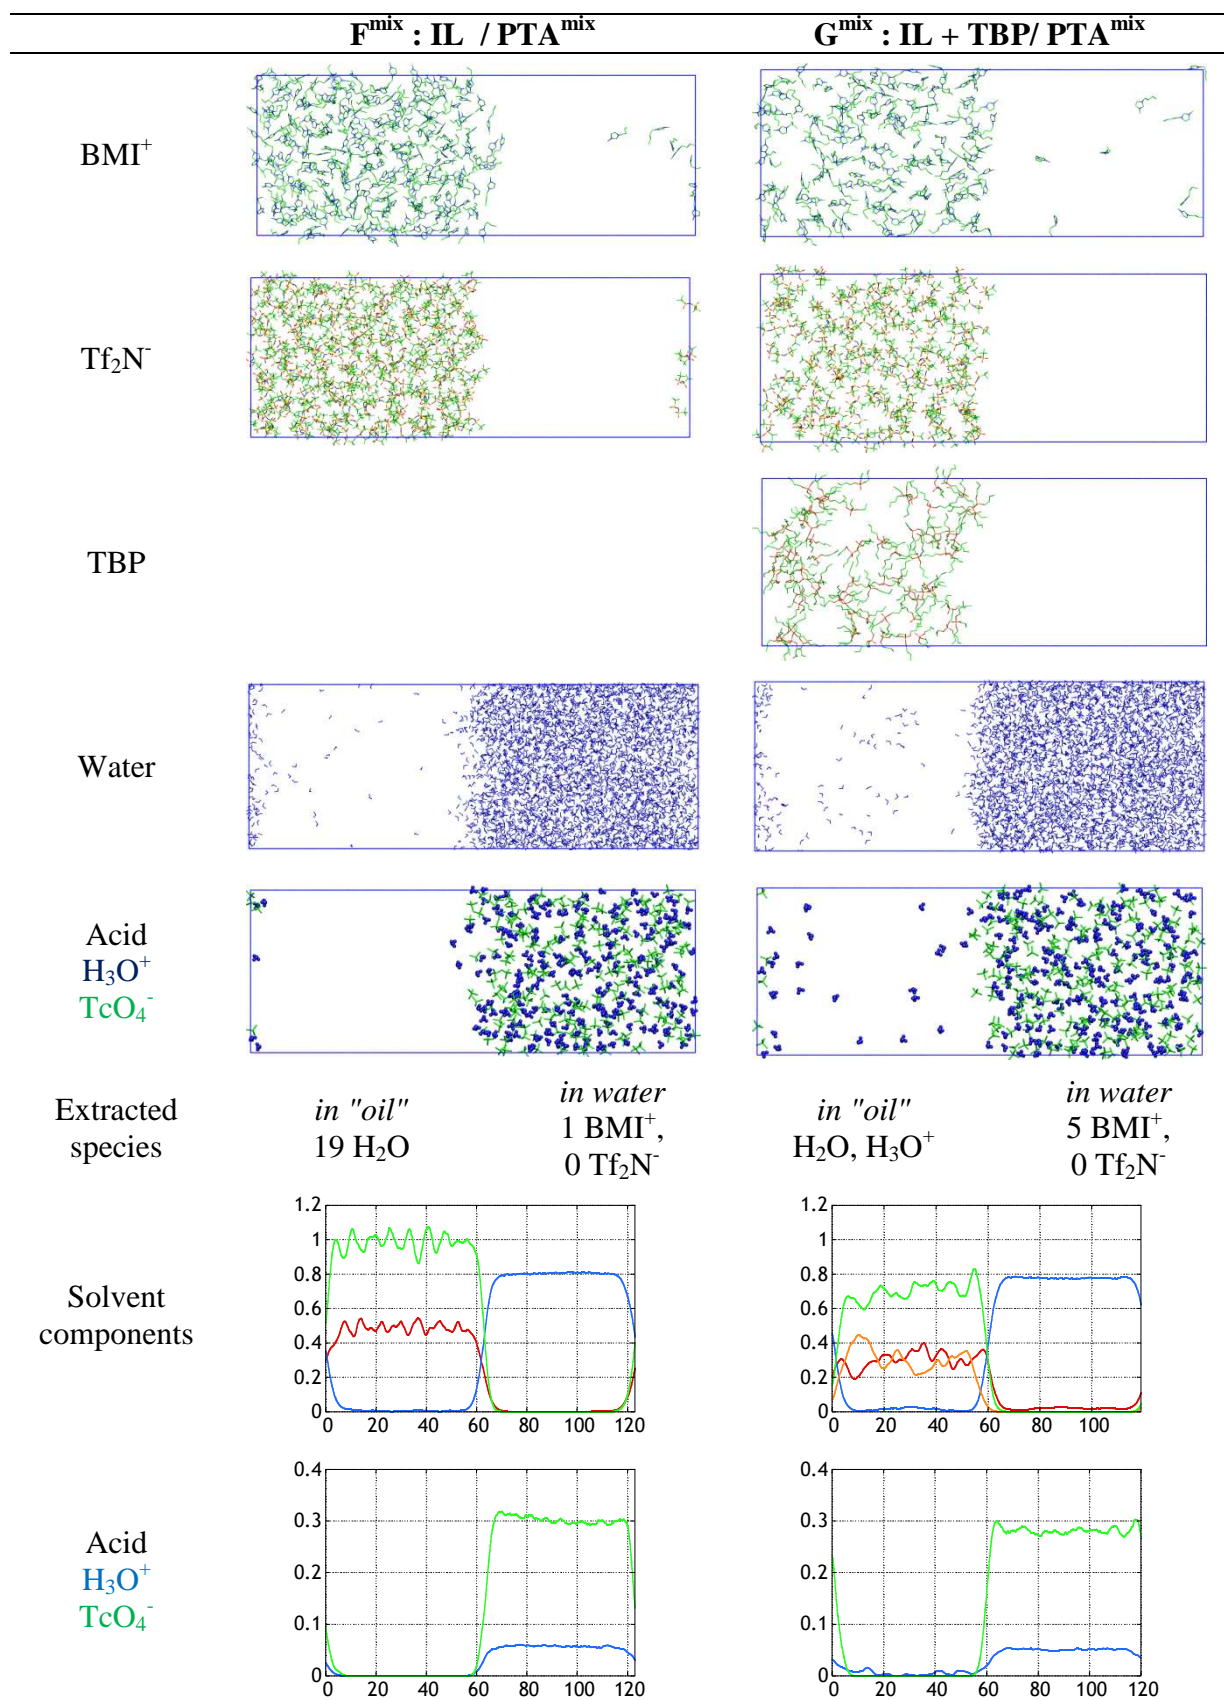

Figure S3: [BMI][Tf<sub>2</sub>N] / PTA<sup>ionic</sup> systems without TBP (left) and with TBP (right). Lines 1 to 5: snapshots highlighting specific solutes. Bottom: density curves of BMI<sup>+</sup> in red, Tf<sub>2</sub>N<sup>-</sup> in green, water in blue, TBP in orange, H<sub>3</sub>O<sup>+</sup> in blue and TcO<sub>4</sub><sup>-</sup> in green.

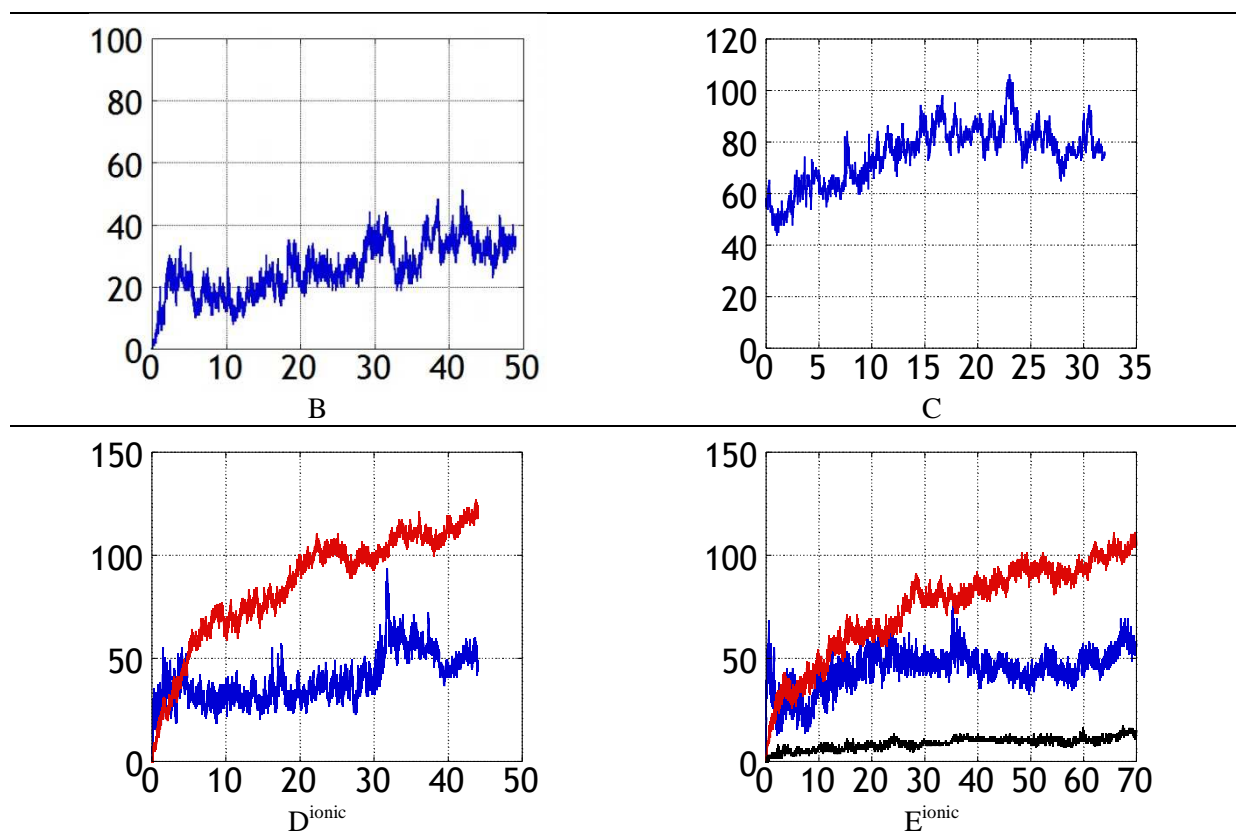

Figure S4: Number of extracted H<sub>2</sub>O (*in blue*), HA acid (*in red*) and H<sub>3</sub>O<sup>+</sup> (*in black*) molecules during the dynamics at 300 K (time in ns).

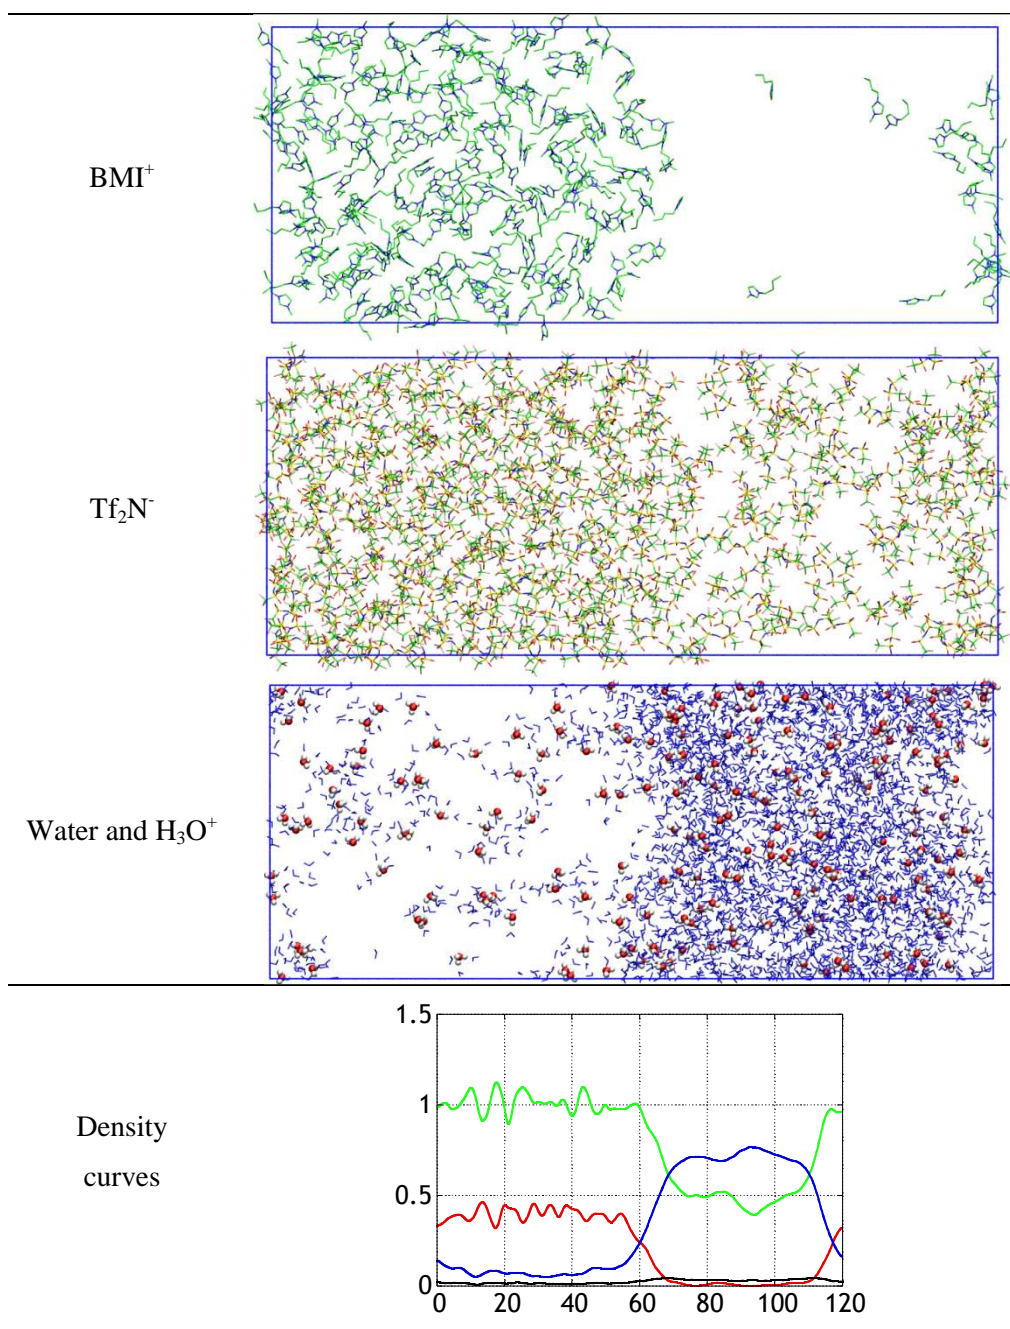

**Figure S5:** [BMI][Tf<sub>2</sub>N] / H<sub>3</sub>O<sup>+</sup> Tf<sub>2</sub>N<sup>-</sup> system after 100 ns. *Lines 1 to 3:* snapshots highlighting specific solvents or solutes. *Bottom:* density curves of BMI<sup>+</sup> in red, Tf<sub>2</sub>N<sup>-</sup> in green, water in blue, H<sub>3</sub>O<sup>+</sup> in black (calculated during the last 1 ns of the dynamics).
